# Supplementary material for: Highly efficient and selective CO2 capture of Li2CO3- and (Li–K)2CO3-based porous carbon composites
Source: Royal Society of Chemistry journal article supplement (doi:10.1039/d3ra02607h), 2023-01-01
Supplement: d3ra02607h1.pdf [file d3ra02607h1.pdf]

## ELECTRONIC SUPPLEMENTARY MATERIALS

for

### Highly Efficient and Selective CO<sub>2</sub> Capture of Li<sub>2</sub>CO<sub>3</sub>- and (Li-K)<sub>2</sub>CO<sub>3</sub>-Based Porous Carbon Composites

*Honghao Li and Tuerxun Nasiman\**

College of Chemistry and Chemical Engineering, Xinjiang Normal University,  
Urumqi, 830054, China

\* Corresponding author: *Tuerxun Nasiman*

E-mail address: 384546761@qq.com

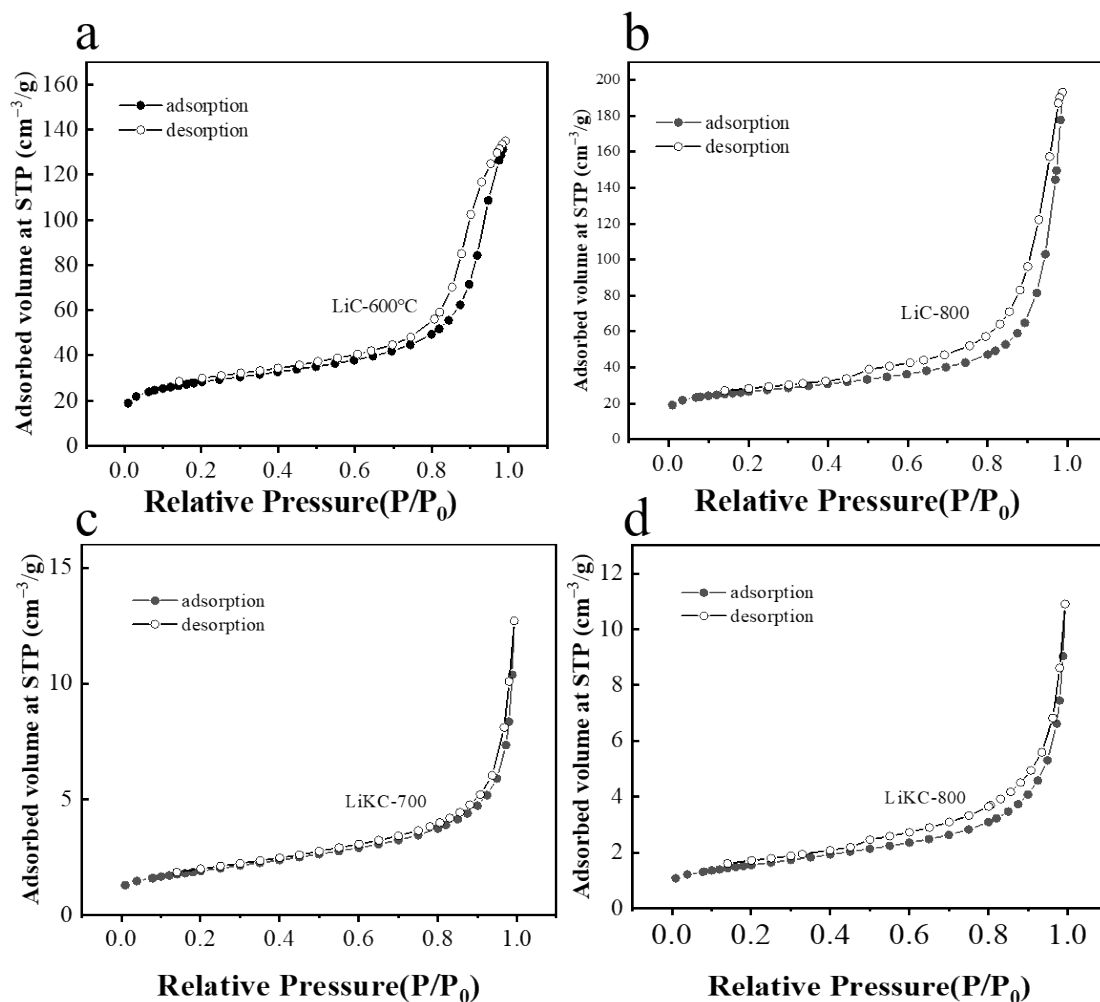

**Fig. S1.** N<sub>2</sub> adsorption (filled symbols) and desorption (unfilled symbols) isotherms of LiC-600 °C (a), LiC-800 °C (b), LiKC-700 and LiKC-800.

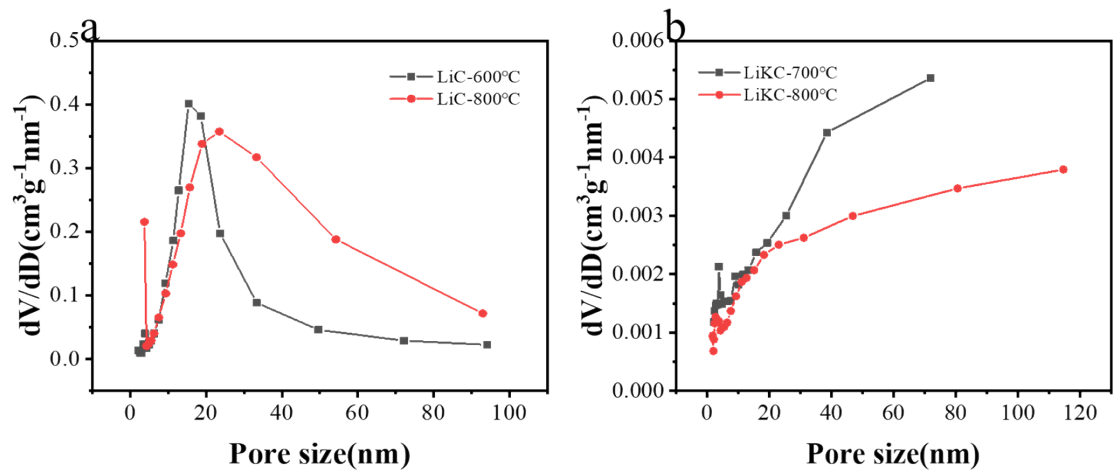

**Fig. S2.** Pore size distributions of LiC (a) and LiKC (b)
